# Supplementary material for: Predictive Value of Malnutrition, Identified via Different Nutritional Screening or Assessment Tools, for Functional Outcomes in Patients with Stroke: A Systematic Review and Meta-Analysis
Source: MDPI journal article supplement (doi:10.3390/nu15143280), 2023-07-24
Supplement: s1 [file nutrients-2498467-supplementary.pdf › nutrients-2498467-supplementary.pdf]

## **Supplementary material to the manuscript**

Predictive value of malnutrition identified by different nutritional screening or assessment tools on functional outcome in patients with stroke: A systematic review.

**Text S1:** Search strategy

**Figure S1:** Sensitivity analyses of the effect of malnutrition on poor outcome in patients with stroke

**Figures S2–S7:** Subgroup analysis of outcomes

**Figure S8:** Funnel plot

**Table S1:** Risk of bias assessment of NRSIs by ROBINS-I tool.

## Text S1. Search strategy

### Pubmed

#1 (Malnutrition[MeSH Terms]) OR (Malnutriti\*[Title/Abstract]) OR (Nutritional Deficienc\*[Title/Abstract]) OR (Undernutriti\*[Title/Abstract]) OR (Malnourishmen\*[Title/Abstract]) OR (Nutritional Status[MeSH Terms]) OR (Nutriti\* Status[Title/Abstract]) OR (nutriti\*[Title/Abstract])

#2 (stroke[MeSH Terms]) OR (Strok\*[Title/Abstract]) OR (Cerebrovascular Acciden\*[Title/Abstract]) OR (CVA[Title/Abstract]) OR (Apoplexy[Title/Abstract]) OR (Brain Vascular Acciden\*[Title/Abstract])

#3 (Deglutition Disorders[MeSH Terms]) OR (Deglutition Disorde\*[Title/Abstract]) OR (Swallowing Disorde\*[Title/Abstract]) OR (Dysphagia[Title/Abstract]) OR (Quality of Life[MeSH Terms]) OR (Quality of Life[Title/Abstract]) OR (Life Quality[Title/Abstract]) OR (HRQOL[Title/Abstract]) OR (QOL[Title/Abstract]) OR (Recovery of Function[MeSH Terms]) OR (Recove\* Function[Title/Abstract]) OR (Function Recove\*[Title/Abstract]) OR (Activities of Daily Living[MeSH Terms]) OR (ADL[Title/Abstract]) OR (Daily Living Activi\*[Title/Abstract]) OR (Chronic Limitation Activi\*[Title/Abstract]) OR (Functional Status[MeSH Terms]) OR (Functional Independence[Title/Abstract]) OR (Functional Dependence[Title/Abstract]) OR (physical function[Title/Abstract]) OR (disability[Title/Abstract]) OR (outcome[Title/Abstract])

#4 #1 AND #2 AND #3

### Embase

#1 (malnutriti\*:ti,ab,kw OR (nutritional:ti,ab,kw AND deficienc\*:ti,ab,kw) OR undernutriti\*:ti,ab,kw OR malnourishmen\*:ti,ab,kw OR (nutriti\*:ti,ab,kw AND status:ti,ab,kw) OR nutriti\*:ti,ab,kw) AND [embase]/lim

#2 (strok\*:ti,ab,kw OR (cerebrovascular:ti,ab,kw AND acciden\*:ti,ab,kw) OR cva:ti,ab,kw OR apoplexy:ti,ab,kw OR (brain:ti,ab,kw AND vascular:ti,ab,kw AND acciden\*:ti,ab,kw)) AND [embase]/lim

#3 (deglutition:ti,ab,kw AND disorde\*:ti,ab,kw OR (swallowing:ti,ab,kw AND disorde\*:ti,ab,kw) OR dysphagia:ti,ab,kw OR (quality:ti,ab,kw AND of:ti,ab,kw AND life:ti,ab,kw) OR (life:ti,ab,kw AND quality:ti,ab,kw) OR hrqol:ti,ab,kw OR qol:ti,ab,kw OR (recove\*:ti,ab,kw AND of:ti,ab,kw AND function:ti,ab,kw) OR (function:ti,ab,kw AND recove\*:ti,ab,kw) OR adl:ti,ab,kw OR (daily:ti,ab,kw AND living:ti,ab,kw AND activi\*:ti,ab,kw) OR (chronic:ti,ab,kw AND limitation:ti,ab,kw AND of:ti,ab,kw AND activi\*:ti,ab,kw) OR (functional:ti,ab,kw AND independence:ti,ab,kw) OR (functional:ti,ab,kw AND dependence:ti,ab,kw) OR (physical:ti,ab,kw AND function:ti,ab,kw)) OR (disability:ti,ab,kw) OR (outcome:ti,ab,kw) AND [embase]/lim

#4 #1 AND #2 AND #3

## CINAHL

- S1 (MM "Malnutrition+") OR Malnutriti\* OR Nutritional Deficienc\* OR Undernutriti\* OR Malnourishmen\*
- S2 (MM "Nutritional Status+") OR Nutriti\* Status OR Nutriti\*
- S3 (MM "stroke+") OR Strok\* OR Cerebrovascular Acciden\* OR CVA OR Apoplexy OR Brain Vascular Acciden\*
- S4 (MM "Deglutition Disorders+") OR Deglutition Disorde\* OR Swallowing Disorde\* OR Dysphagia
- S5 (MM "Quality of Life+") OR Quality of Life OR Life Quality OR HRQOL OR QOL
- S6 (MM "Recovery of Function+") OR Recove\* of Function OR Function Recove\*
- S7 (MM "Activities of Daily Living+") OR ADL OR Daily Living Activi\* OR Chronic Limitation of Activi\*
- S8 (MM "Functional Status+") OR Functional Independence OR Functional Dependence OR physical function OR disability or outcome
- S9 (S1 OR S2) AND S3 AND (S4 OR S5 OR S6 OR S7 OR S8)

## Cochrane Library

- #1 MeSH descriptor: [Malnutrition] explode all trees
- #2 (Malnutriti\*):ti,ab,kw OR (Nutritional Deficienc\*):ti,ab,kw OR (Undernutriti\*):ti,ab,kw OR (Malnourishmen\*):ti,ab,kw
- #3 MeSH descriptor: [Nutritional Status] explode all trees
- #4 (Nutriti\* Status):ti,ab,kw OR (Nutriti\*):ti,ab,kw
- #5 MeSH descriptor: [Stroke] explode all trees
- #6 (Strok\*):ti,ab,kw OR (Cerebrovascular Acciden\*):ti,ab,kw OR (CVA):ti,ab,kw OR (Apoplexy):ti,ab,kw OR (Brain Vascular Acciden\*):ti,ab,kw
- #7 MeSH descriptor: [Deglutition Disorders] explode all trees
- #8 (Deglutition Disorde\*):ti,ab,kw OR (Swallowing Disorde\*):ti,ab,kw OR (Dysphagia):ti,ab,kw
- #9 MeSH descriptor: [Quality of Life] explode all trees
- #10 (Quality of Life):ti,ab,kw OR (Life Quality):ti,ab,kw OR (HRQOL):ti,ab,kw OR (QOL):ti,ab,kw
- #11 MeSH descriptor: [Recovery of Function] explode all trees
- #12 (Recove\* of Function):ti,ab,kw OR (Function Recove\*):ti,ab,kw
- #13 MeSH descriptor: [Activities of Daily Living] explode all trees
- #14 (ADL):ti,ab,kw OR (Daily Living Activi\*):ti,ab,kw OR (Chronic Limitation of Activi\*):ti,ab,kw
- #15 MeSH descriptor: [Functional Status] explode all trees
- #16 (Functional Independence):ti,ab,kw OR (Functional Dependence):ti,ab,kw OR (physical function):ti,ab,kw OR (disability):ti,ab,kw OR (outcome):ti,ab,kw
- #17 (#1 OR #2 OR #3 OR #4) AND (#5 OR #6) AND (#7 OR #8 OR #9 OR #10 OR #11 OR #12 OR #13 OR #14 OR #15 OR #16)

CNKI

(TI=('营养不良'+ '营养不足'+ '营养状态') OR AB=('营养不良'+ '营养不足'+ '营养状态')) AND (TI=('中风'+ '脑出血'+ '脑梗'+ '脑血管意外'+ '卒中'+ '脑缺血') OR AB=('中风'+ '脑出血'+ '脑梗'+ '脑血管意外'+ '卒中'+ '脑缺血')) AND (TI=('吞咽障碍'+ '吞咽功能'+ '吞咽困难'+ '生活质量'+ 'QOL'+ '身体功能'+ '活动能力'+ '功能恢复'+ 'ADL'+ '生活能力'+ '功能状态'+ '自理'+ '残疾'+ '结局') OR AB=('吞咽障碍'+ '吞咽功能'+ '生活质量'+ 'QOL'+ '身体功能'+ '活动能力'+ '功能恢复'+ 'ADL'+ '生活能力'+ '功能状态'+ '自理'+ '残疾'+ '结局'))

CBM

- 1 "营养不良"[不加权:扩展] OR "营养状态" OR "营养不足" OR "营养不良"
- 2 "卒中"[不加权:扩展] OR "卒中" OR "缺血性脑卒中" OR "出血性脑卒中" OR "脑梗死"
- 3 "吞咽障碍"[不加权:扩展] OR "吞咽障碍" OR "吞咽困难" OR "生活质量"[不加权:扩展] OR "生活质量" OR "QOL" OR "日常生活活动"[不加权:扩展] OR "ADL" OR "功能恢复"[不加权:扩展] OR "功能恢复" OR "功能状态"[不加权:扩展] OR "功能状态" OR "身体功能" OR "残疾"[不加权:扩展] OR "残疾" OR "结局"[不加权:扩展] OR "结局"
- 4 1 AND 2 AND 3

Figure S1. Sensitivity analyses of the effect of malnutrition on poor outcome in patients with stroke

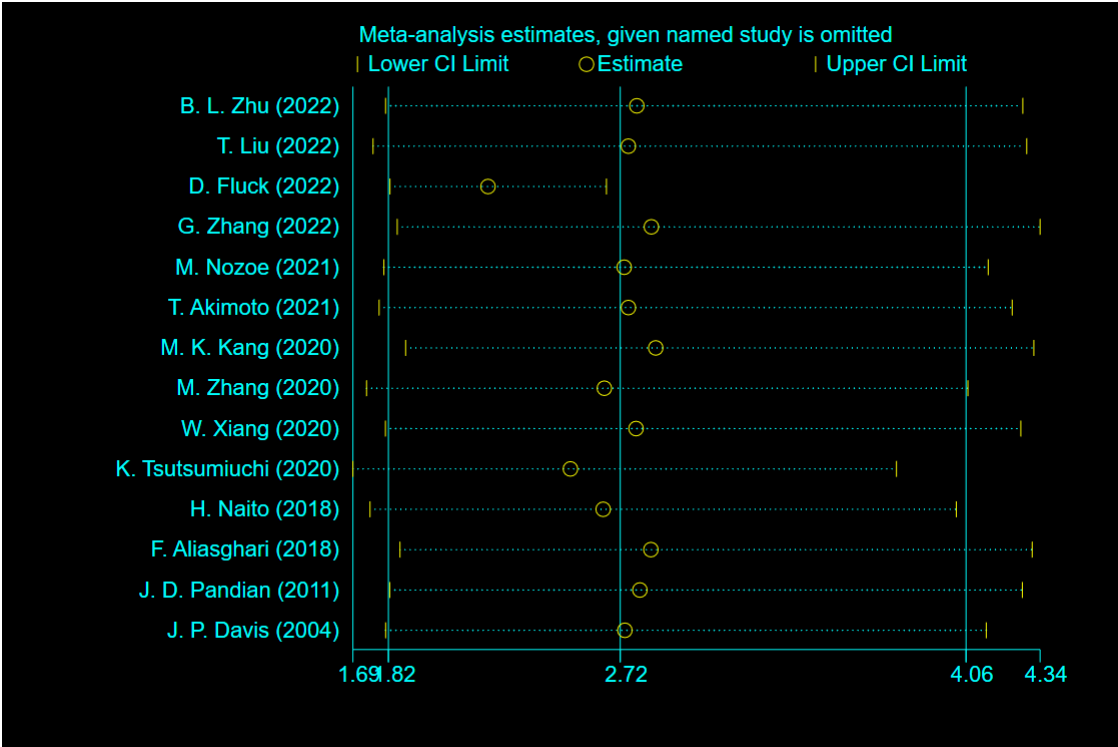

Figure S2. Subgroup analysis of the impact of malnutrition identified by screening or assessment on poor functional outcomes in patients with stroke.

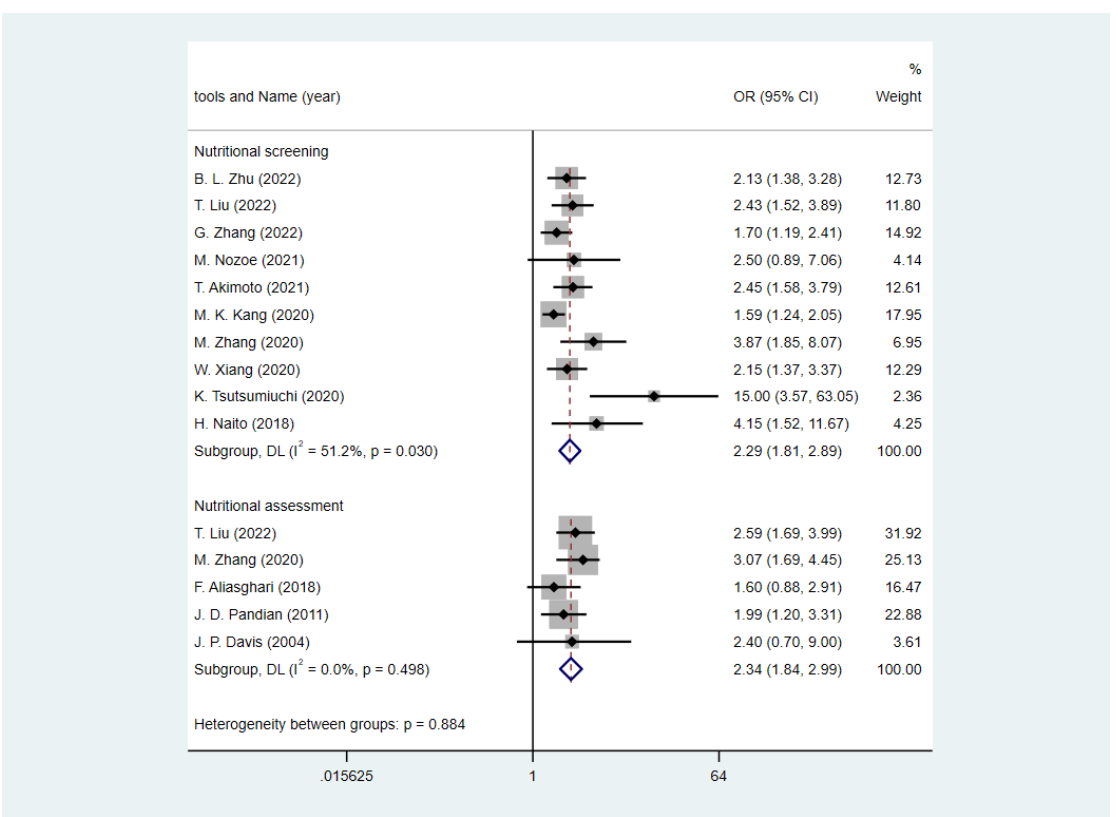

Figure S3. Subgroup analysis of the impact of malnutrition identified by screening or assessment on FIM points in patients with stroke.

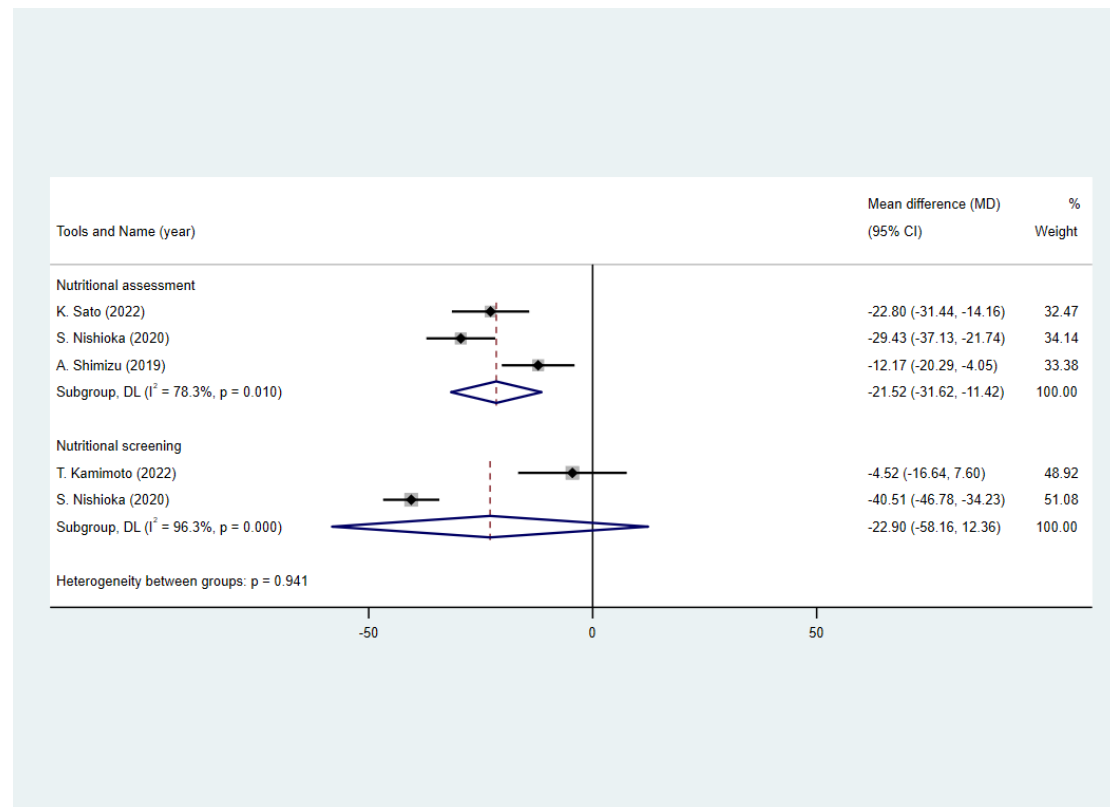

Figure S4. Subgroup analysis of the impact of malnutrition identified by each tool on FIM points in patients with stroke.

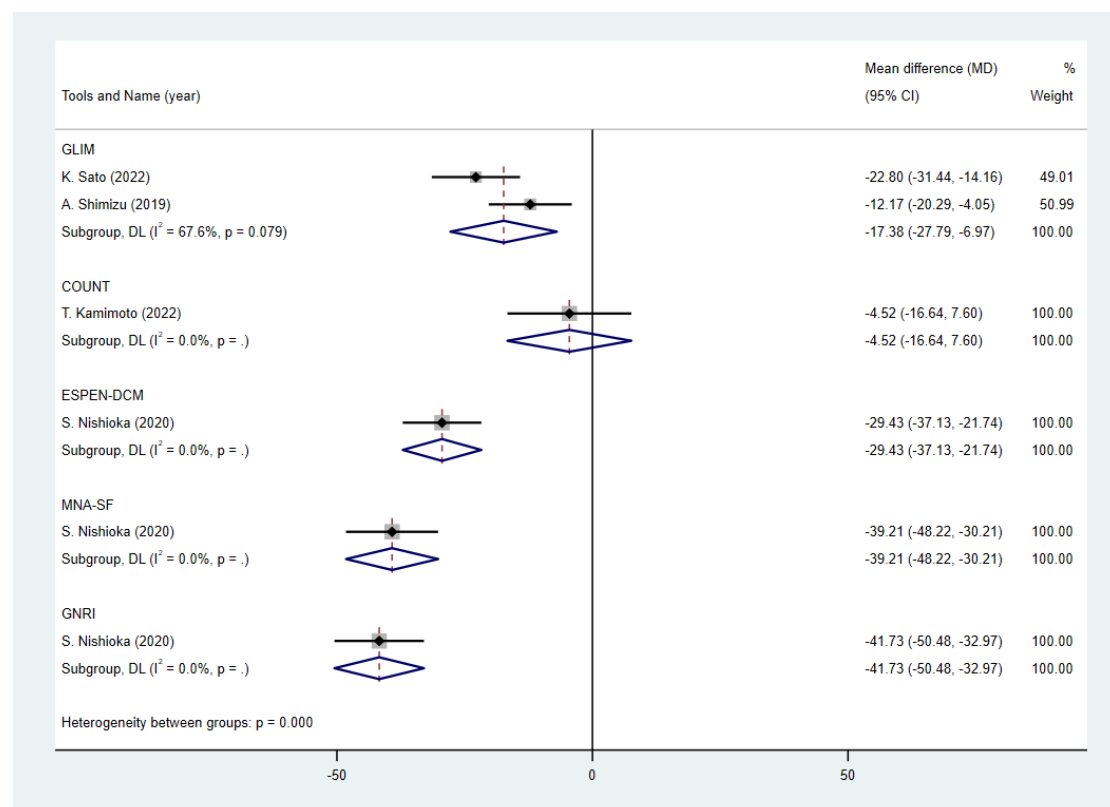

Figure S5. Subgroup analysis of the impact of malnutrition identified by screening or assessment on dysphagia in patients with stroke.

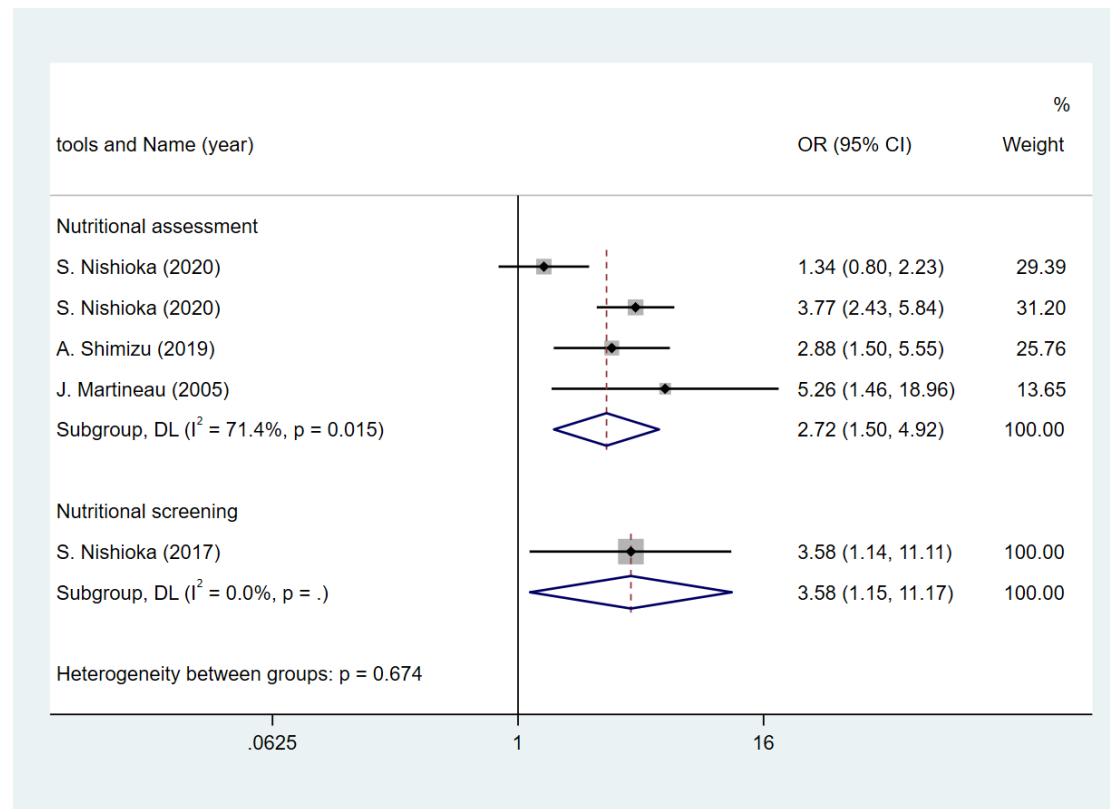

Figure S6. Subgroup analysis of the impact of malnutrition identified by each tool on dysphagia in patients with stroke.

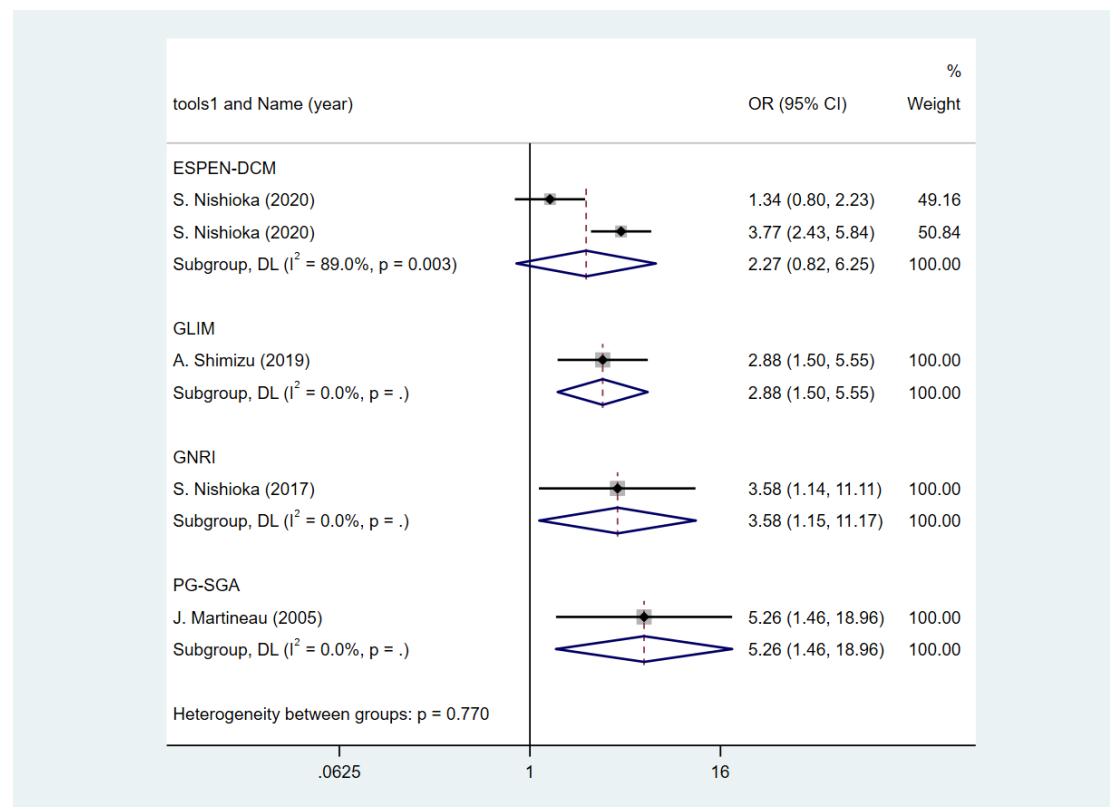

Figure S7. Subgroup analysis of the impact of malnutrition identified by each tool on poor functional outcomes in patients with stroke.

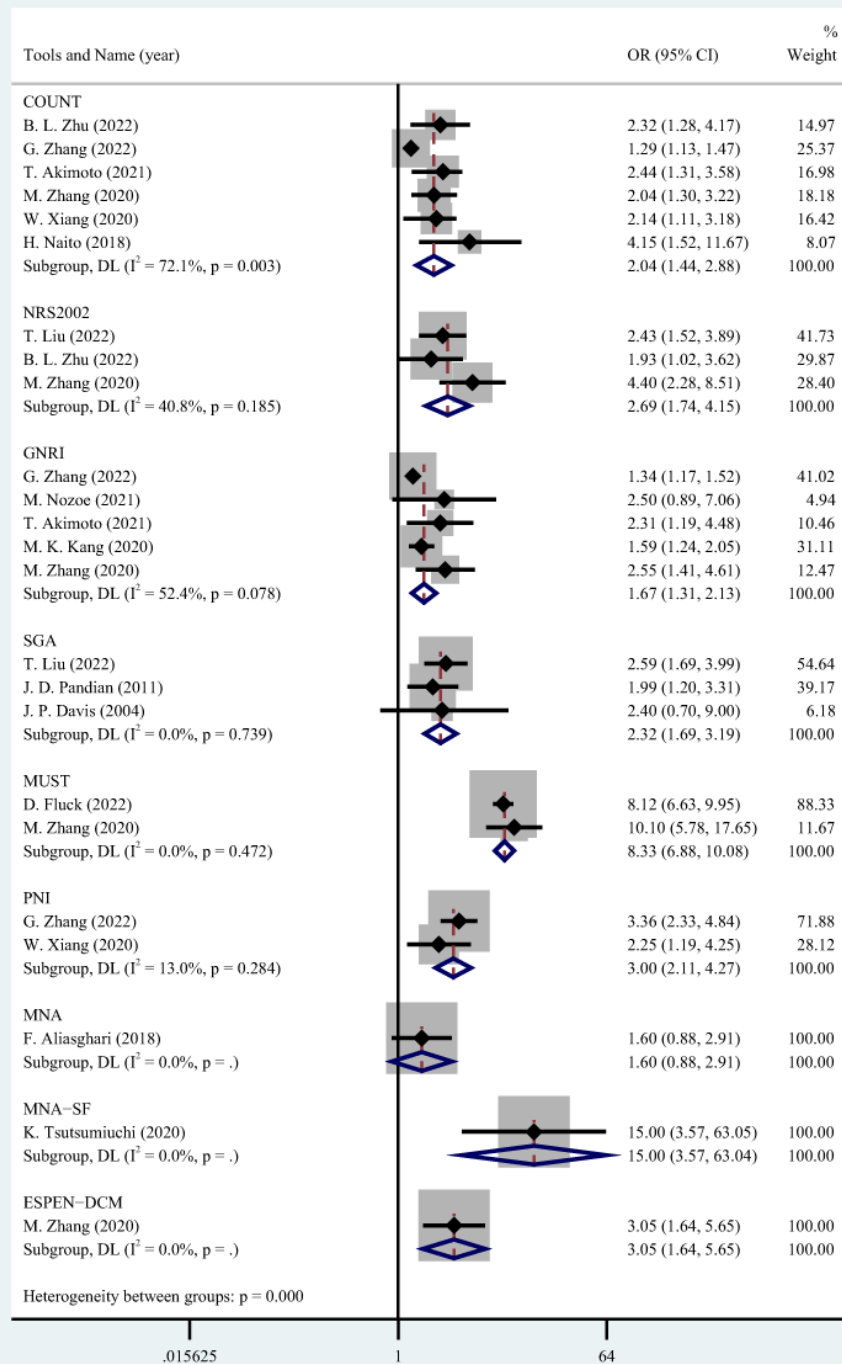



Figure S8: Funnel plot

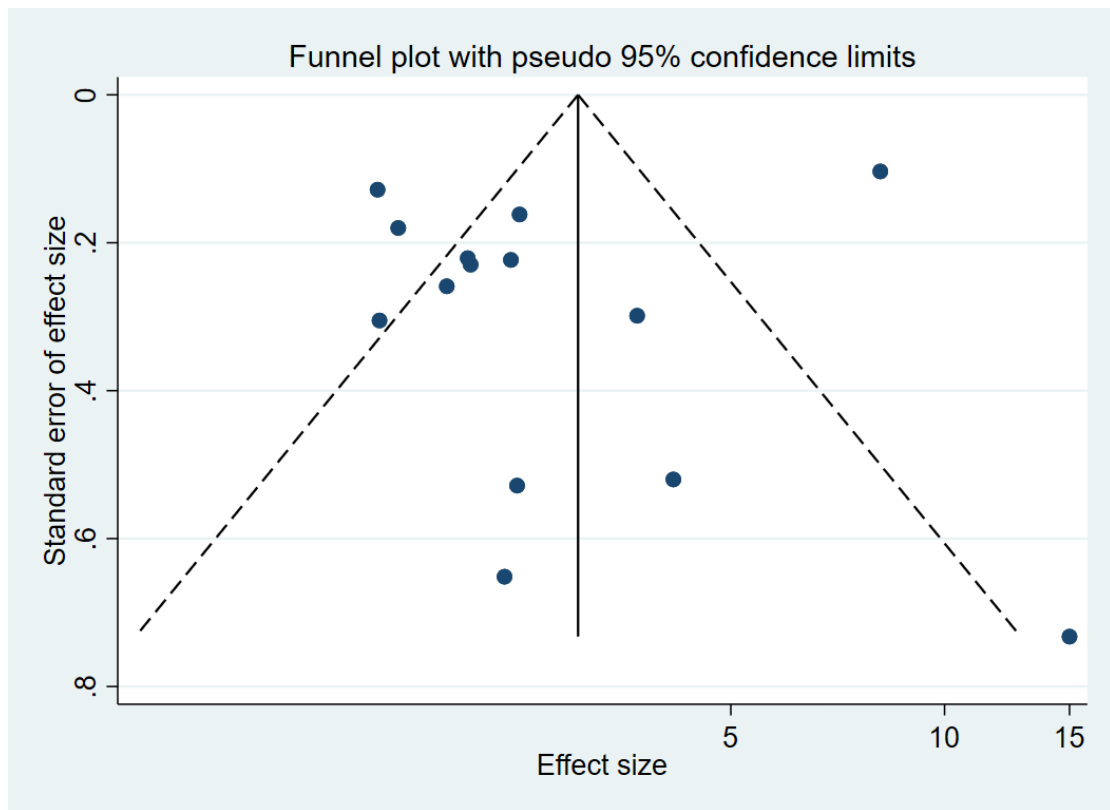

Table S1. Risk of bias assessment by ROBINS-I.

| Study             | Bias due to confounding | Bias in selection of participants into the study | Bias in measurement classification of interventions | Bias due to deviations from intended interventions | Bias due to missing data | Bias in measurement of outcomes | Bias in selection of the reported result | Overall  |
|-------------------|-------------------------|--------------------------------------------------|-----------------------------------------------------|----------------------------------------------------|--------------------------|---------------------------------|------------------------------------------|----------|
| Zhu 2022          | Moderate                | Low                                              | Low                                                 | Moderate                                           | Moderate                 | Low                             | Moderate                                 | Moderate |
| Sato 2022         | Moderate                | Moderate                                         | Low                                                 | Moderate                                           | Moderate                 | Low                             | Moderate                                 | Moderate |
| Liu 2022          | Moderate                | Serious                                          | Low                                                 | Moderate                                           | Moderate                 | Low                             | Moderate                                 | Serious  |
| Lee 2022          | Moderate                | Moderate                                         | Low                                                 | Moderate                                           | Serious                  | Low                             | Moderate                                 | Serious  |
| Kamimoto 2022     | Serious                 | Moderate                                         | Low                                                 | Moderate                                           | Low                      | Low                             | Serious                                  | Serious  |
| Fluck 2022        | Moderate                | Low                                              | Low                                                 | Moderate                                           | Low                      | Low                             | Moderate                                 | Moderate |
| Zhang 2022        | Moderate                | Low                                              | Low                                                 | Moderate                                           | Low                      | Low                             | Moderate                                 | Moderate |
| Nozoe             | Moderate                | Low                                              | Low                                                 | Moderate                                           | Moderate                 | Low                             | Moderate                                 | Moderate |
| Akimoto 2021      | Serious                 | Moderate                                         | Low                                                 | Moderate                                           | Moderate                 | Low                             | Serious                                  | Serious  |
| Scrutinio 2020    | Moderate                | Low                                              | Low                                                 | Moderate                                           | Moderate                 | Low                             | Moderate                                 | Moderate |
| Nishioka 2020     | Moderate                | Moderate                                         | Low                                                 | Serious                                            | Serious                  | Low                             | Moderate                                 | Serious  |
| Nishioka 2020     | Serious                 | Low                                              | Low                                                 | Moderate                                           | Moderate                 | Low                             | Moderate                                 | Serious  |
| Kokura 2020       | Serious                 | Moderate                                         | Low                                                 | Moderate                                           | Moderate                 | Low                             | Moderate                                 | Serious  |
| Irisawa 2020      | Serious                 | Low                                              | Low                                                 | Moderate                                           | Low                      | Low                             | Moderate                                 | Serious  |
| Kang 2020         | Low                     | Low                                              | Low                                                 | Low                                                | Low                      | Low                             | Moderate                                 | Moderate |
| Zhang 2020        | Moderate                | Low                                              | Low                                                 | Moderate                                           | Moderate                 | Low                             | Moderate                                 | Moderate |
| Xiang             | Moderate                | Low                                              | Low                                                 | Moderate                                           | Low                      | Low                             | Moderate                                 | Moderate |
| Tsutsumiuchi 2020 | Moderate                | Moderate                                         | Low                                                 | Moderate                                           | Moderate                 | Low                             | Moderate                                 | Moderate |
| Shimizu 2019      | Moderate                | Low                                              | Low                                                 | Moderate                                           | Moderate                 | Low                             | Moderate                                 | Moderate |

|                    |          |          |     |          |          |     |          |          |
|--------------------|----------|----------|-----|----------|----------|-----|----------|----------|
| Naito 2018         | Serious  | Moderate | Low | Moderate | Moderate | Low | Moderate | Serious  |
| Aliasghari<br>2018 | Moderate | Serious  | Low | Moderate | Low      | Low | Moderate | Serious  |
| Nishioka 2017      | Low      | Low      | Low | Moderate | Low      | Low | Low      | Moderate |
| Kokura 2016        | Moderate | Moderate | Low | Moderate | Moderate | Low | Moderate | Moderate |
| Pandian 2011       | Moderate | Low      | Low | Moderate | Low      | Low | Moderate | Moderate |
| Martineau<br>2005  | Serious  | Low      | Low | Moderate | Moderate | Low | Serious  | Serious  |
| Davis 2004         | Moderate | Low      | Low | Moderate | Moderate | Low | Moderate | Moderate |

---

Abbreviations: NRSIs, non-randomized studies of interventions (including cohort studies, case-control studies, etc.); ROBINS-I, risk of bias in non-randomized studies of interventions.
